# Supplementary material for: Normalize the response of EPID in pursuit of linear accelerator dosimetry standardization
Source: PubMed Central journal article supplement (PMC5768011; doi:10.1002/acm2.12222), 2017-11-10

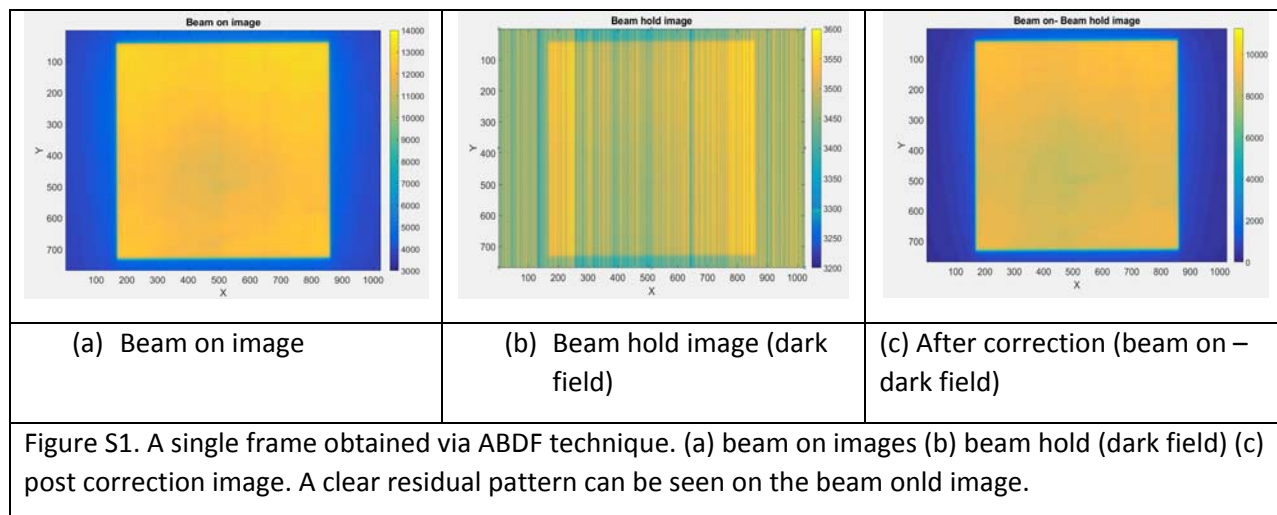

Supplement: ACM2-19-73-s001.pdf [file ACM2-19-73-s001.pdf]
